# Supplementary material for: MicroRNA regulatory networks associated with abnormal muscle repair in survivors of critical illness
Source: PubMed Central journal article supplement — J Cachexia Sarcopenia Muscle. 2022 Jan 28;13(2):1262–76. doi: 10.1002/jcsm.12903 (PMC8977950; doi:10.1002/jcsm.12903), 2022-01-28
Supplement: JCSM-13-1262-s003.pdf [file JCSM-13-1262-s003.pdf]

**Supplementary Table 2: List of differentially expressed MiRs with the number of targets in the signature(s) for the subgroup(s) in which they are differentially expressed.** For each miR is listed the subgroup in which the miR was differentially expressed, the direction of the miR expression, the direction of the target gene expression, number of target miRs in the signature, hypergeometric p-value with Bonferroni adjustment, observed/expected ratio and the minimum number of databases supporting miR target prediction for the analysis. *Abbreviations.* ICUAW = ICU-acquired weakness; DBs = databases; Exp = experimentally validated database (Tarbase); 7D = Day 7 post-ICU (vs. healthy individuals); 6M = Month 6 post-ICU (vs. healthy individuals); Improver= Patient phenotype at month 6 post-ICU with increase in quadriceps cross sectional area to “normal” (sex and age matched population based norms, and > 10cm<sup>2</sup>) compared with non-improvers (sustained quadriceps wasting, increase in cross sectional area <10 cm<sup>2</sup>).

| miR              | Subgroup | Direction of miR expression | Direction of Target genes expression | Number of targets | Bonferroni adjusted p-value | Observed/Expected | Number of DBs predicting target interaction |
|------------------|----------|-----------------------------|--------------------------------------|-------------------|-----------------------------|-------------------|---------------------------------------------|
| hsa-miR-1321     | 7D       | up                          | down                                 | 4                 | 1.87E-01                    | 1.78              | 4                                           |
| hsa-miR-206      | 7D       | down                        | up                                   | 62                | 1.45E-01                    | 1.15              | 2                                           |
| hsa-miR-23a-3p   | 7D       | down                        | up                                   | 124               | 3.05E-06                    | 1.50              | Exp                                         |
| hsa-miR-29a-3p   | 7D       | down                        | down                                 | 72                | 8.19E-02                    | 1.18              | 2                                           |
| hsa-miR-29a-3p   | 7D       | down                        | down                                 | 10                | 1.04E-01                    | 1.58              | 4                                           |
| hsa-miR-29a-3p   | 7D       | down                        | up                                   | 88                | 4.82E-02                    | 1.19              | Exp                                         |
| hsa-miR-29b-3p   | 7D       | down                        | down                                 | 71                | 9.88E-02                    | 1.17              | 2                                           |
| hsa-miR-29b-3p   | 7D       | down                        | down                                 | 9                 | 1.76E-01                    | 1.44              | 4                                           |
| hsa-miR-29b-3p   | 7D       | down                        | up                                   | 71                | 1.42E-01                    | 1.14              | Exp                                         |
| hsa-miR-3133     | 7D       | up                          | up                                   | 33                | 8.74E-02                    | 1.28              | 3                                           |
| hsa-miR-3136-3p  | 7D       | up                          | up                                   | 40                | 8.80E-02                    | 1.25              | 2                                           |
| hsa-miR-3175     | 7D       | down                        | up                                   | 3                 | 9.14E-02                    | 2.79              | Exp                                         |
| hsa-miR-3175     | 7D       | down                        | down                                 | 3                 | 1.44E-01                    | 2.27              | Exp                                         |
| hsa-miR-3622a-3p | 7D       | up                          | down                                 | 54                | 1.33E-01                    | 1.17              | 2                                           |
| hsa-miR-3622a-3p | 7D       | up                          | down                                 | 13                | 1.07E-02                    | 2.06              | 3                                           |
| hsa-miR-424-3p   | 7D       | down                        | up                                   | 11                | 1.94E-01                    | 1.35              | Exp                                         |
| hsa-miR-424-5p   | 7D       | down                        | down                                 | 51                | 4.66E-02                    | 1.27              | 3                                           |
| hsa-miR-424-5p   | 7D       | down                        | up                                   | 143               | 1.70E-02                    | 1.18              | Exp                                         |
| hsa-miR-424-5p   | 7D       | down                        | down                                 | 170               | 3.02E-02                    | 1.15              | Exp                                         |
| hsa-miR-4488     | 7D       | down                        | up                                   | 4                 | 1.03E-04                    | 13.93             | Exp                                         |
| hsa-miR-4516     | 7D       | down                        | up                                   | 16                | 9.61E-02                    | 1.43              | 3                                           |
| hsa-miR-4707-5p  | 7D       | down                        | up                                   | 7                 | 5.47E-02                    | 2.05              | 2                                           |
| hsa-miR-4707-5p  | 7D       | down                        | up                                   | 2                 | 7.72E-02                    | 4.29              | 3                                           |
| hsa-miR-4764-3p  | 7D       | up                          | down                                 | 5                 | 1.31E-01                    | 1.86              | 3                                           |
| hsa-miR-4780     | 7D       | down                        | up                                   | 6                 | 1.05E-01                    | 1.86              | 3                                           |
| hsa-miR-4795-5p  | 7D       | up                          | up                                   | 7                 | 1.01E-01                    | 1.77              | 3                                           |
| hsa-miR-502-3p   | 7D       | down                        | down                                 | 12                | 1.95E-01                    | 1.33              | 3                                           |
| hsa-miR-502-3p   | 7D       | down                        | down                                 | 7                 | 2.05E-02                    | 2.52              | 4                                           |
| hsa-miR-502-3p   | 7D       | down                        | up                                   | 26                | 5.28E-02                    | 1.40              | Exp                                         |
| hsa-miR-548as-3p | 7D       | up                          | up                                   | 97                | 7.56E-02                    | 1.15              | 2                                           |
| hsa-miR-551a     | 7D       | up                          | down                                 | 2                 | 4.55E-02                    | 5.67              | Exp                                         |
| hsa-miR-5704     | 7D       | up                          | up                                   | 24                | 2.99E-02                    | 1.51              | 2                                           |
| hsa-miR-574-3p   | 7D       | up                          | up                                   | 1                 | 1.67E-01                    | 5.57              | 4                                           |
| hsa-miR-600      | 7D       | up                          | up                                   | 20                | 1.17E-02                    | 1.75              | 3                                           |
| hsa-miR-600      | 7D       | up                          | up                                   | 8                 | 1.46E-02                    | 2.50              | 4                                           |
| hsa-miR-638      | 7D       | down                        | up                                   | 5                 | 8.37E-02                    | 2.14              | Exp                                         |
| hsa-miR-638      | 7D       | down                        | down                                 | 6                 | 6.62E-02                    | 2.09              | Exp                                         |
| hsa-miR-663a     | 7D       | down                        | down                                 | 4                 | 1.69E-01                    | 1.85              | 3                                           |
| hsa-miR-424-3p   | 6M       | down                        | up                                   | 4                 | 8.79E-02                    | 2.38              | 3                                           |
| hsa-miR-5007-3p  | 6M       | up                          | up                                   | 21                | 1.49E-01                    | 1.28              | 2                                           |
| hsa-miR-181a-5p  | Improver | down                        | up                                   | 57                | 1.35E-01                    | 1.16              | 2                                           |
| hsa-miR-181a-5p  | Improver | down                        | down                                 | 38                | 1.04E-01                    | 1.24              | 2                                           |
| hsa-miR-181a-5p  | Improver | down                        | up                                   | 185               | 1.49E-09                    | 1.53              | Exp                                         |
| hsa-miR-181a-5p  | Improver | down                        | down                                 | 132               | 7.93E-11                    | 1.75              | Exp                                         |
| hsa-miR-196b-5p  | Improver | down                        | down                                 | 30                | 3.21E-02                    | 1.43              | 2                                           |
| hsa-miR-196b-5p  | Improver | down                        | up                                   | 14                | 1.49E-01                    | 1.37              | 3                                           |
| hsa-miR-196b-5p  | Improver | down                        | down                                 | 12                | 2.84E-02                    | 1.87              | 3                                           |
| hsa-miR-196b-5p  | Improver | down                        | up                                   | 4                 | 1.76E-01                    | 1.82              | 4                                           |
| hsa-miR-196b-5p  | Improver | down                        | down                                 | 3                 | 1.58E-01                    | 2.18              | 4                                           |
| hsa-miR-196b-5p  | Improver | down                        | up                                   | 51                | 5.90E-02                    | 1.25              | Exp                                         |
| hsa-miR-196b-5p  | Improver | down                        | down                                 | 42                | 1.13E-03                    | 1.65              | Exp                                         |
| hsa-miR-205-3p   | Improver | up                          | down                                 | 90                | 7.99E-02                    | 1.16              | 2                                           |
| hsa-miR-205-3p   | Improver | up                          | down                                 | 30                | 9.69E-03                    | 1.58              | 3                                           |
| hsa-miR-3124-3p  | Improver | up                          | down                                 | 31                | 5.11E-02                    | 1.36              | 2                                           |
| hsa-miR-33b-5p   | Improver | down                        | down                                 | 42                | 9.21E-03                    | 1.46              | 2                                           |
| hsa-miR-33b-5p   | Improver | down                        | down                                 | 16                | 1.52E-02                    | 1.83              | 3                                           |
| hsa-miR-33b-5p   | Improver | down                        | up                                   | 7                 | 5.98E-02                    | 2.01              | 4                                           |
| hsa-miR-33b-5p   | Improver | down                        | down                                 | 5                 | 6.75E-02                    | 2.29              | 4                                           |
| hsa-miR-33b-5p   | Improver | down                        | up                                   | 38                | 5.23E-05                    | 1.98              | Exp                                         |
| hsa-miR-33b-5p   | Improver | down                        | down                                 | 18                | 5.80E-02                    | 1.50              | Exp                                         |
| hsa-miR-3611     | Improver | up                          | up                                   | 11                | 1.59E-01                    | 1.41              | Exp                                         |
| hsa-miR-3611     | Improver | up                          | down                                 | 10                | 2.52E-02                    | 2.05              | Exp                                         |
| hsa-miR-4279     | Improver | up                          | down                                 | 54                | 1.36E-01                    | 1.16              | 2                                           |
| hsa-miR-4290     | Improver | up                          | up                                   | 7                 | 6.65E-02                    | 1.96              | 3                                           |
| hsa-miR-4299     | Improver | up                          | down                                 | 25                | 1.98E-01                    | 1.20              | 2                                           |
| hsa-miR-4419b    | Improver | up                          | down                                 | 59                | 5.77E-02                    | 1.23              | 2                                           |
| hsa-miR-4421     | Improver | up                          | down                                 | 3                 | 9.23E-02                    | 2.79              | Exp                                         |

|                 |          |      |      |     |          |      |     |
|-----------------|----------|------|------|-----|----------|------|-----|
| hsa-miR-4473    | Improver | up   | up   | 12  | 2.53E-02 | 1.90 | Exp |
| hsa-miR-4478    | Improver | up   | down | 58  | 1.02E-01 | 1.18 | 2   |
| hsa-miR-4530    | Improver | up   | down | 54  | 1.48E-01 | 1.16 | 2   |
| hsa-miR-4536-3p | Improver | down | down | 8   | 4.00E-02 | 2.08 | 2   |
| hsa-miR-4667-5p | Improver | up   | down | 11  | 2.43E-02 | 1.98 | 3   |
| hsa-miR-4682    | Improver | up   | down | 13  | 2.20E-02 | 1.89 | 3   |
| hsa-miR-4698    | Improver | up   | down | 131 | 8.64E-05 | 1.37 | 2   |
| hsa-miR-4698    | Improver | up   | down | 46  | 2.14E-03 | 1.56 | 3   |
| hsa-miR-4698    | Improver | up   | up   | 7   | 1.06E-01 | 1.75 | Exp |
| hsa-miR-4701-5p | Improver | down | down | 52  | 6.01E-02 | 1.25 | 2   |
| hsa-miR-4701-5p | Improver | down | down | 6   | 1.58E-01 | 1.65 | 3   |
| hsa-miR-4709-3p | Improver | up   | down | 68  | 1.10E-02 | 1.32 | 2   |
| hsa-miR-4712-3p | Improver | up   | down | 36  | 6.60E-02 | 1.30 | 2   |
| hsa-miR-4732-3p | Improver | up   | up   | 42  | 1.40E-01 | 1.19 | 2   |
| hsa-miR-4732-3p | Improver | up   | down | 28  | 1.19E-01 | 1.27 | 2   |
| hsa-miR-4732-3p | Improver | up   | up   | 8   | 4.72E-02 | 2.00 | 3   |
| hsa-miR-4739    | Improver | up   | down | 13  | 1.91E-01 | 1.32 | 3   |
| hsa-miR-4747-5p | Improver | up   | down | 63  | 5.29E-02 | 1.23 | 2   |
| hsa-miR-4747-5p | Improver | up   | down | 16  | 4.38E-02 | 1.61 | 3   |
| hsa-miR-4762-5p | Improver | up   | up   | 62  | 1.60E-01 | 1.14 | 2   |
| hsa-miR-4762-5p | Improver | up   | down | 44  | 5.07E-02 | 1.29 | 2   |
| hsa-miR-4762-5p | Improver | up   | up   | 24  | 2.86E-02 | 1.52 | 3   |
| hsa-miR-4800-3p | Improver | up   | down | 3   | 1.64E-01 | 2.14 | 2   |
| hsa-miR-483-3p  | Improver | up   | down | 9   | 5.53E-02 | 1.86 | 2   |
| hsa-miR-485-3p  | Improver | up   | down | 37  | 1.14E-02 | 1.48 | 2   |
| hsa-miR-485-3p  | Improver | up   | up   | 11  | 1.35E-01 | 1.46 | Exp |
| hsa-miR-485-3p  | Improver | up   | down | 7   | 1.94E-01 | 1.49 | Exp |
| hsa-miR-490-3p  | Improver | up   | down | 32  | 2.15E-02 | 1.46 | 2   |
| hsa-miR-490-3p  | Improver | up   | down | 10  | 1.91E-02 | 2.15 | 3   |
| hsa-miR-490-3p  | Improver | up   | up   | 4   | 7.89E-03 | 4.89 | 4   |
| hsa-miR-490-3p  | Improver | up   | down | 2   | 9.16E-02 | 3.91 | 4   |
| hsa-miR-490-3p  | Improver | up   | down | 14  | 4.82E-03 | 2.21 | Exp |
| hsa-miR-516b-5p | Improver | up   | up   | 66  | 1.41E-01 | 1.14 | 2   |
| hsa-miR-516b-5p | Improver | up   | down | 46  | 5.48E-02 | 1.28 | 2   |
| hsa-miR-516b-5p | Improver | up   | down | 12  | 1.32E-01 | 1.44 | 3   |
| hsa-miR-516b-5p | Improver | up   | down | 4   | 5.11E-02 | 2.86 | 4   |
| hsa-miR-5187-3p | Improver | up   | down | 47  | 1.32E-02 | 1.40 | 2   |
| hsa-miR-589-5p  | Improver | down | down | 8   | 1.39E-01 | 1.57 | 3   |
| hsa-miR-589-5p  | Improver | down | down | 3   | 2.88E-02 | 4.46 | 4   |
| hsa-miR-597     | Improver | down | down | 8   | 1.60E-01 | 1.52 | 2   |
| hsa-miR-597     | Improver | down | down | 4   | 1.55E-02 | 4.13 | 3   |
| hsa-miR-642b-5p | Improver | up   | down | 21  | 3.89E-02 | 1.52 | 2   |
| hsa-miR-642b-5p | Improver | up   | down | 6   | 8.50E-02 | 1.97 | 3   |
| hsa-miR-660-3p  | Improver | up   | down | 44  | 1.06E-01 | 1.21 | 2   |
| hsa-miR-660-3p  | Improver | up   | down | 19  | 5.10E-02 | 1.51 | Exp |
| hsa-miR-665     | Improver | up   | down | 55  | 1.90E-01 | 1.13 | 2   |
| hsa-miR-744-5p  | Improver | up   | down | 20  | 1.80E-01 | 1.25 | Exp |
