# Supplementary material for: MicroRNA regulatory networks associated with abnormal muscle repair in survivors of critical illness
Source: PubMed Central journal article supplement — J Cachexia Sarcopenia Muscle. 2022 Jan 28;13(2):1262–76. doi: 10.1002/jcsm.12903 (PMC8977950; doi:10.1002/jcsm.12903), 2022-01-28
Supplement: JCSM-13-1262-s006.pdf [file JCSM-13-1262-s006.pdf]

**Supplementary Table 3: Network reconstruction output.** For each miR is reported the number of interactions that constitute its regulon, and the minimum, 25<sup>th</sup> percentile, 50<sup>th</sup> percentile, 75<sup>th</sup> percentile and maximum of the mutual information distribution inside the regulon.

| miR              | Interactions | Mutual Information |         |         |         |         |
|------------------|--------------|--------------------|---------|---------|---------|---------|
|                  |              | Min                | 25%     | 50%     | 75%     | Max     |
| hsa-mir-424-3p   | 414          | 0.32473            | 0.37247 | 0.38861 | 0.40744 | 0.50657 |
| hsa-mir-574-3p   | 393          | 0.33021            | 0.36552 | 0.38109 | 0.39923 | 0.56244 |
| hsa-mir-4795-5p  | 353          | 0.31655            | 0.36631 | 0.38121 | 0.39748 | 0.47209 |
| hsa-mir-4780     | 334          | 0.32999            | 0.36964 | 0.38371 | 0.40305 | 0.48604 |
| hsa-mir-3622a-3p | 332          | 0.32639            | 0.36473 | 0.37752 | 0.39375 | 0.50178 |
| hsa-mir-424-5p   | 332          | 0.32454            | 0.36635 | 0.38014 | 0.39953 | 0.49575 |
| hsa-mir-600      | 284          | 0.33061            | 0.36964 | 0.38333 | 0.4035  | 0.51085 |
| hsa-mir-1321     | 276          | 0.32345            | 0.36386 | 0.37872 | 0.39068 | 0.45334 |
| hsa-mir-502-3p   | 275          | 0.3306             | 0.36354 | 0.37702 | 0.39567 | 0.48841 |
| hsa-mir-3175     | 266          | 0.33333            | 0.36822 | 0.38336 | 0.39909 | 0.4742  |
| hsa-mir-3136-3p  | 261          | 0.33565            | 0.36908 | 0.38345 | 0.40493 | 0.58508 |
| hsa-mir-29b-3p   | 259          | 0.32372            | 0.3628  | 0.37661 | 0.39732 | 0.46295 |
| hsa-mir-663a     | 253          | 0.32335            | 0.36798 | 0.38419 | 0.40074 | 0.48906 |
| hsa-mir-29a-3p   | 239          | 0.32592            | 0.36327 | 0.37882 | 0.39618 | 0.43845 |
| hsa-mir-23a-3p   | 231          | 0.33441            | 0.36328 | 0.37488 | 0.39076 | 0.48098 |
| hsa-mir-638      | 215          | 0.33727            | 0.3652  | 0.38048 | 0.39478 | 0.5238  |
| hsa-mir-4536-3p  | 203          | 0.32394            | 0.3663  | 0.3812  | 0.40312 | 0.46089 |
| hsa-mir-4764-3p  | 201          | 0.32786            | 0.3635  | 0.37674 | 0.39284 | 0.4561  |
| hsa-mir-4516     | 195          | 0.32172            | 0.35857 | 0.37495 | 0.39128 | 0.44148 |
| hsa-mir-206      | 193          | 0.33029            | 0.36019 | 0.37657 | 0.39105 | 0.48625 |
| hsa-mir-4488     | 186          | 0.32229            | 0.36039 | 0.37037 | 0.38545 | 0.46097 |
| hsa-mir-5704     | 181          | 0.32832            | 0.36636 | 0.38209 | 0.39661 | 0.44966 |
| hsa-mir-551a     | 173          | 0.32915            | 0.36443 | 0.38101 | 0.40111 | 0.47926 |
| hsa-mir-3133     | 159          | 0.33381            | 0.36435 | 0.38244 | 0.39821 | 0.45898 |
| hsa-mir-589-5p   | 151          | 0.33344            | 0.36514 | 0.38334 | 0.3976  | 0.45107 |
| hsa-mir-5007-3p  | 145          | 0.33077            | 0.36631 | 0.38026 | 0.40291 | 0.45214 |
| hsa-mir-548as-3p | 132          | 0.33643            | 0.36582 | 0.37852 | 0.39747 | 0.48024 |
| hsa-mir-597      | 125          | 0.331              | 0.36344 | 0.37735 | 0.3989  | 0.46761 |
| hsa-mir-744-5p   | 125          | 0.32971            | 0.36165 | 0.37604 | 0.39205 | 0.47139 |
| hsa-mir-4530     | 118          | 0.32781            | 0.36358 | 0.37343 | 0.38897 | 0.48897 |
| hsa-mir-4732-3p  | 111          | 0.32991            | 0.36288 | 0.37773 | 0.39725 | 0.46168 |
| hsa-mir-4707-5p  | 110          | 0.33257            | 0.36163 | 0.37353 | 0.39015 | 0.44891 |
| hsa-mir-665      | 110          | 0.3044             | 0.3598  | 0.3773  | 0.39997 | 0.48483 |
| hsa-mir-4279     | 107          | 0.32004            | 0.36764 | 0.38557 | 0.4022  | 0.45663 |
| hsa-mir-660-3p   | 104          | 0.33164            | 0.36454 | 0.37861 | 0.39672 | 0.45829 |
| hsa-mir-490-3p   | 97           | 0.33011            | 0.36097 | 0.38055 | 0.39911 | 0.43651 |
| hsa-mir-4800-3p  | 93           | 0.32783            | 0.36112 | 0.37434 | 0.38862 | 0.42978 |
| hsa-mir-483-3p   | 92           | 0.31792            | 0.36188 | 0.38163 | 0.40023 | 0.45184 |
| hsa-mir-4290     | 91           | 0.33682            | 0.36298 | 0.38037 | 0.40092 | 0.4694  |
| hsa-mir-642b-5p  | 91           | 0.32904            | 0.36451 | 0.37348 | 0.39417 | 0.44258 |
| hsa-mir-4701-5p  | 89           | 0.31832            | 0.36202 | 0.3754  | 0.39277 | 0.42943 |
| hsa-mir-4747-5p  | 89           | 0.34145            | 0.36283 | 0.37846 | 0.39511 | 0.46855 |

|                 |    |         |         |         |         |         |
|-----------------|----|---------|---------|---------|---------|---------|
| hsa-mir-4419b   | 86 | 0.33132 | 0.36314 | 0.37899 | 0.39518 | 0.46076 |
| hsa-mir-3124-3p | 83 | 0.33298 | 0.3651  | 0.38209 | 0.40282 | 0.48894 |
| hsa-mir-3611    | 77 | 0.3294  | 0.35792 | 0.37147 | 0.38492 | 0.45725 |
| hsa-mir-4478    | 74 | 0.32597 | 0.36801 | 0.37975 | 0.4001  | 0.44857 |
| hsa-mir-4421    | 73 | 0.331   | 0.36408 | 0.38018 | 0.39417 | 0.43765 |
| hsa-mir-4739    | 71 | 0.32738 | 0.36734 | 0.38285 | 0.40982 | 0.45404 |
| hsa-mir-181a-5p | 66 | 0.34136 | 0.36547 | 0.3775  | 0.39288 | 0.45029 |
| hsa-mir-4762-5p | 66 | 0.33705 | 0.36255 | 0.3806  | 0.39488 | 0.46934 |
| hsa-mir-4698    | 64 | 0.32145 | 0.36265 | 0.37836 | 0.39717 | 0.43368 |
| hsa-mir-4667-5p | 63 | 0.33554 | 0.36365 | 0.37696 | 0.39381 | 0.43921 |
| hsa-mir-5187-3p | 63 | 0.33855 | 0.36107 | 0.37632 | 0.401   | 0.44938 |
| hsa-mir-4473    | 62 | 0.33947 | 0.36602 | 0.38503 | 0.41563 | 0.44725 |
| hsa-mir-516b-5p | 62 | 0.32984 | 0.35632 | 0.37326 | 0.38701 | 0.43804 |
| hsa-mir-196b-5p | 61 | 0.34262 | 0.36093 | 0.38058 | 0.39445 | 0.46702 |
| hsa-mir-4709-3p | 60 | 0.32766 | 0.35359 | 0.37061 | 0.39764 | 0.45977 |
| hsa-mir-485-3p  | 58 | 0.3366  | 0.36052 | 0.37252 | 0.39437 | 0.44245 |
| hsa-mir-33b-5p  | 55 | 0.33187 | 0.36234 | 0.38002 | 0.40664 | 0.45265 |
| hsa-mir-4712-3p | 50 | 0.30866 | 0.3573  | 0.36977 | 0.38929 | 0.44696 |
| hsa-mir-4299    | 48 | 0.34532 | 0.3628  | 0.37597 | 0.39438 | 0.44096 |
| hsa-mir-205-3p  | 47 | 0.33357 | 0.36225 | 0.38524 | 0.39594 | 0.45116 |
| hsa-mir-4682    | 29 | 0.31401 | 0.35445 | 0.37037 | 0.39422 | 0.43794 |
