# Supplementary material for: MicroRNA regulatory networks associated with abnormal muscle repair in survivors of critical illness
Source: PubMed Central journal article supplement — J Cachexia Sarcopenia Muscle. 2022 Jan 28;13(2):1262–76. doi: 10.1002/jcsm.12903 (PMC8977950; doi:10.1002/jcsm.12903), 2022-01-28
Supplement: JCSM-13-1262-s008.pdf [file JCSM-13-1262-s008.pdf]

**Supplementary Table 4: Results of the master regulator analysis (MRA) for each miR regulon.**

The table lists, for each miR, the subgroup in which it is differentially expressed, its direction of change and the direction of change of the differentially expressed genes in MRA and the MRA p-value (Fisher's exact test). *Abbreviations and terms* : 7D, Day 7 post ICU discharge; Improver, patient phenotype at month 6 post-ICU with increase normalizing quadriceps cross sectional area, and  $\geq 10$  cm<sup>2</sup>; up, upregulated; down, downregulated.

| miR              | Subgroup | miR regulation | Gene regulation | p-value     |
|------------------|----------|----------------|-----------------|-------------|
| hsa-mir-1321     | 7D       | up             | down            | 4.11E-79    |
| hsa-mir-424-5p   | 7D       | down           | up              | 2.44E-74    |
| hsa-mir-424-3p   | 7D       | down           | up              | 1.60E-69    |
| hsa-mir-3622a-3p | 7D       | up             | down            | 3.47E-61    |
| hsa-mir-424-5p   | 7D       | down           | down            | 4.63E-50    |
| hsa-mir-3175     | 7D       | down           | down            | 2.30E-49    |
| hsa-mir-29a-3p   | 7D       | down           | down            | 3.16E-42    |
| hsa-mir-29b-3p   | 7D       | down           | down            | 8.71E-40    |
| hsa-mir-502-3p   | 7D       | down           | up              | 3.07E-37    |
| hsa-mir-3175     | 7D       | down           | up              | 4.42E-37    |
| hsa-mir-206      | 7D       | down           | up              | 1.22E-36    |
| hsa-mir-4780     | 7D       | down           | up              | 9.94E-35    |
| hsa-mir-23a-3p   | 7D       | down           | up              | 1.00E-34    |
| hsa-mir-638      | 7D       | down           | down            | 5.71E-33    |
| hsa-mir-4795-5p  | 7D       | up             | up              | 1.34E-31    |
| hsa-mir-574-3p   | 7D       | up             | up              | 5.42E-31    |
| hsa-mir-29b-3p   | 7D       | down           | up              | 2.46E-27    |
| hsa-mir-4516     | 7D       | down           | up              | 1.68E-24    |
| hsa-mir-29a-3p   | 7D       | down           | up              | 7.57E-23    |
| hsa-mir-4764-3p  | 7D       | up             | down            | 3.40E-21    |
| hsa-mir-502-3p   | 7D       | down           | down            | 5.02E-21    |
| hsa-mir-551a     | 7D       | up             | down            | 6.81E-20    |
| hsa-mir-3136-3p  | 7D       | up             | up              | 1.18E-19    |
| hsa-mir-638      | 7D       | down           | up              | 2.13E-16    |
| hsa-mir-600      | 7D       | up             | up              | 1.33E-14    |
| hsa-mir-4488     | 7D       | down           | up              | 1.75E-14    |
| hsa-mir-5704     | 7D       | up             | up              | 9.02E-14    |
| hsa-mir-490-3p   | Improver | up             | up              | 3.87E-13    |
| hsa-mir-663a     | 7D       | down           | down            | 2.38E-12    |
| hsa-mir-4732-3p  | Improver | up             | up              | 8.61E-10    |
| hsa-mir-4290     | Improver | up             | up              | 3.35E-09    |
| hsa-mir-642b-5p  | Improver | up             | down            | 5.79E-09    |
| hsa-mir-4762-5p  | Improver | up             | down            | 4.85E-08    |
| hsa-mir-490-3p   | Improver | up             | down            | 1.04E-07    |
| hsa-mir-3133     | 7D       | up             | up              | 2.17E-07    |
| hsa-mir-4279     | Improver | up             | down            | 2.65E-06    |
| hsa-mir-660-3p   | Improver | up             | down            | 6.02E-06    |
| hsa-mir-4421     | Improver | up             | down            | 2.64E-05    |
| hsa-mir-3124-3p  | Improver | up             | down            | 3.78E-05    |
| hsa-mir-665      | Improver | up             | down            | 4.97E-05    |
| hsa-mir-4473     | Improver | up             | up              | 7.64E-05    |
| hsa-mir-4698     | Improver | up             | down            | 8.55E-05    |
| hsa-mir-4530     | Improver | up             | down            | 0.000137491 |
| hsa-mir-4732-3p  | Improver | up             | down            | 0.000175593 |
| hsa-mir-4762-5p  | Improver | up             | up              | 0.000184849 |
| hsa-mir-4747-5p  | Improver | up             | down            | 0.000315945 |
| hsa-mir-485-3p   | Improver | up             | up              | 0.000360794 |
| hsa-mir-548as-3p | 7D       | up             | up              | 0.00037128  |
| hsa-mir-3611     | Improver | up             | up              | 0.000628242 |
| hsa-mir-196b-5p  | Improver | down           | down            | 0.000757459 |
| hsa-mir-4698     | Improver | up             | up              | 0.001747298 |
| hsa-mir-4707-5p  | 7D       | down           | up              | 0.002402213 |

|                 |          |      |      |             |
|-----------------|----------|------|------|-------------|
| hsa-mir-4739    | Improver | up   | down | 0.002970471 |
| hsa-mir-205-3p  | Improver | up   | down | 0.004102455 |
| hsa-mir-483-3p  | Improver | up   | down | 0.011089712 |
| hsa-mir-597     | Improver | down | down | 0.018263816 |
| hsa-mir-4712-3p | Improver | up   | down | 0.019417231 |
| hsa-mir-4701-5p | Improver | down | down | 0.019698563 |
| hsa-mir-589-5p  | Improver | down | down | 0.021295127 |
| hsa-mir-744-5p  | Improver | up   | down | 0.03074114  |
| hsa-mir-4667-5p | Improver | up   | down | 0.038197496 |
| hsa-mir-4682    | Improver | up   | down | 0.045016619 |
